# Supplementary material
Source: MDPI journal article supplement (https://www.mdpi.com/2073-4344/13/5/801)
Supplement: s1 [file s1]

## Electronic Supporting Information

# Nitrogen-Rich Porous Carbon Nanotubes Coated Co/Mo<sub>2</sub>N Composites Derived from Metal-Organic Framework as Efficient Bifunctional Oxygen Electrocatalysts

Shiang Li <sup>1,†</sup>, Yuehong Xie <sup>2,†</sup>, Chao Feng <sup>3,\*</sup>, Afaq Hassan <sup>1</sup> and Jide Wang <sup>1,\*</sup>

<sup>1</sup> Key Laboratory of Oil and Gas Fine Chemicals, Ministry of Education, Xinjiang Uygur Autonomous Region, College of Chemistry and Chemical Engineering, Xinjiang University, Urumqi 830046, China; lsa719446919@163.com (S.L.); afaq.hassan@uog.edu.pk (A.H.)

<sup>2</sup> Engineering Research Center of Energy Storage Materials and Devices, Ministry of Education, School of Chemistry, Xi'an Jiaotong University, Xi'an 710115, China; xieyhol@sina.com

<sup>3</sup> Ansteel Research Institute of Vanadium&Titanium (Iron&Steel), Chengdu 610031, China

\* Correspondence: afengc@126.com (C.F.); awangjd@126.com (J.W.)

† These authors contributed equally to this work.

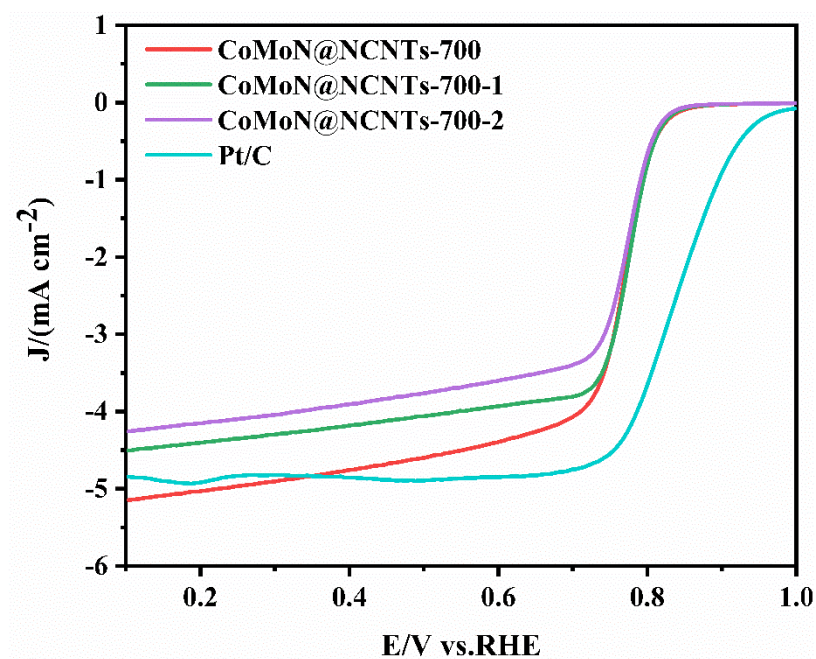

**Figure S1.** The LSV of series of prepared composites at rotating speed of 1600 rpm for ORR in 0.1 M KOH.

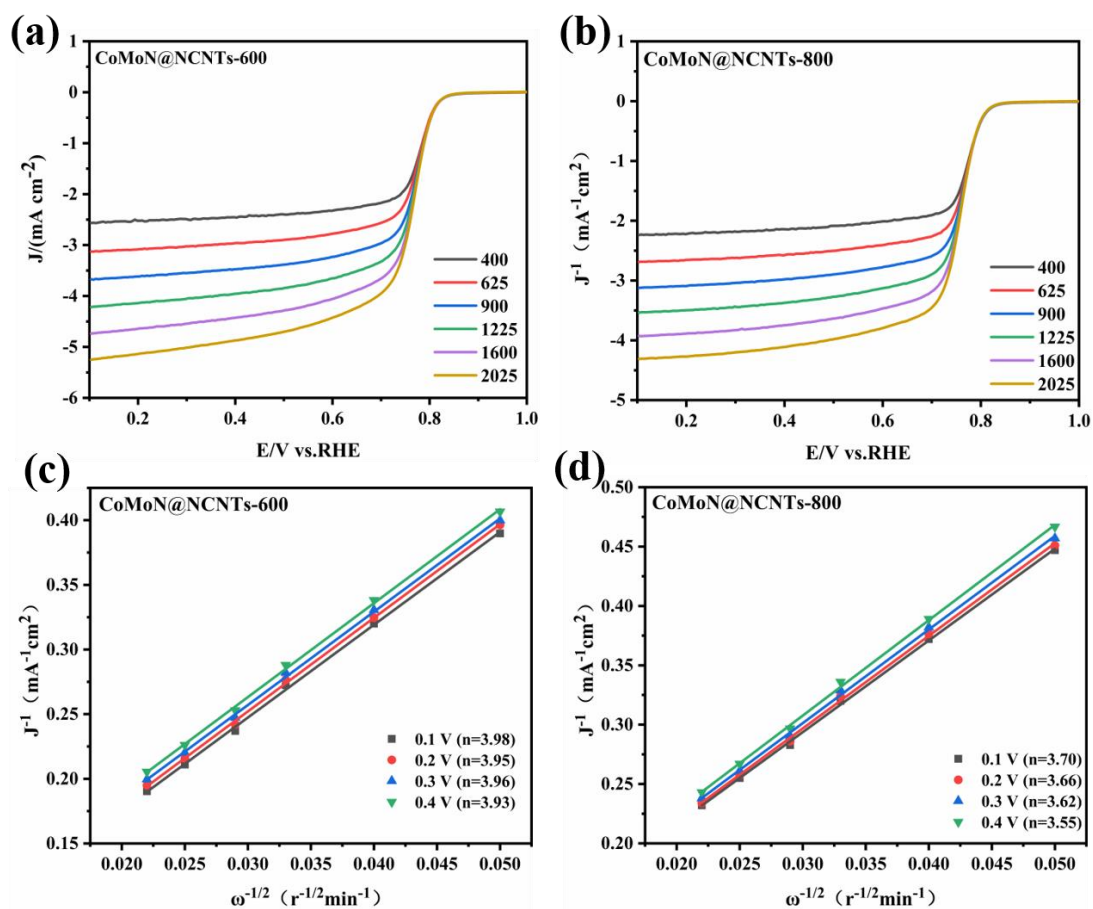

**Figure S2.** The LSV of (a) CoMoN@NCNTs-600 and (b) CoMoN@NCNTs-800 with the different rotating speed (400 to 2025 rpm) in 0.1 M KOH; K-L curves of (c)

CoMoN@NCNTs-600 and (d) CoMoN@NCNTs-800.

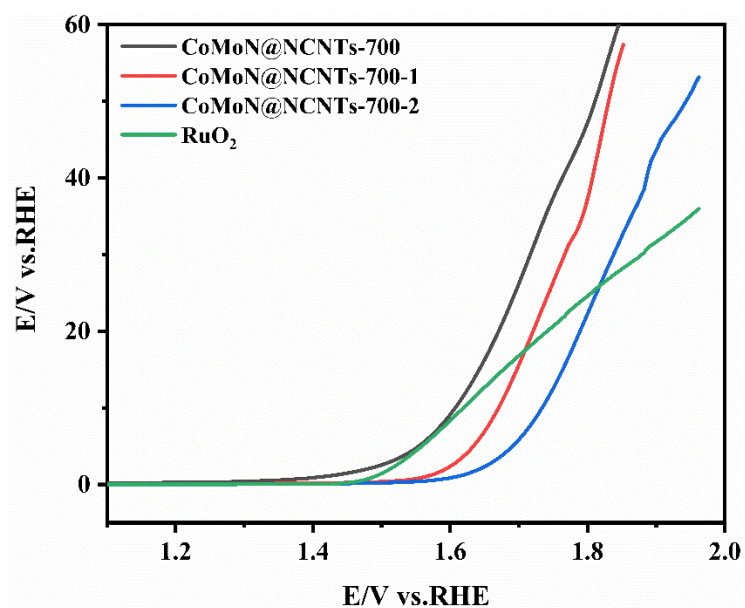

**Figure S3.** The LSV of series of prepared composites at rotating speed of 1600 rpm for OER in 0.1 M KOH.

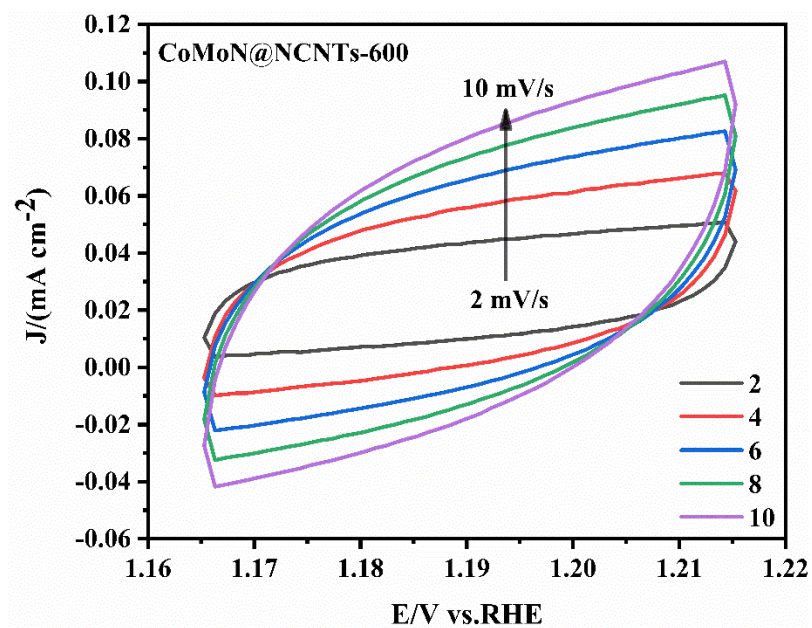

**Figure S4.** CV of CoMoN@NCNTs-600 measured at different scan rates from 2 to 10 mV s<sup>-1</sup>.

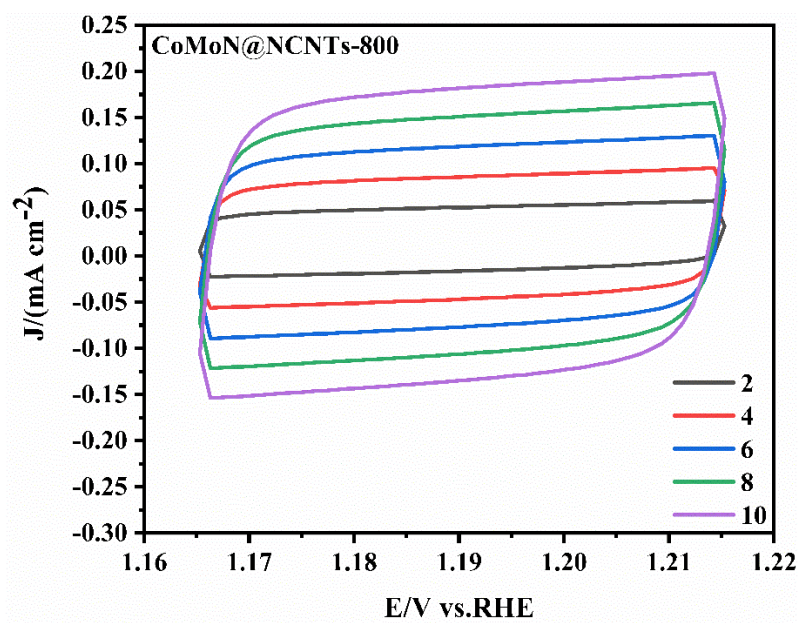

**Figure S5.** CV of CoMoN@NCNTs-800 measured at different scan rates from 2 to 10 mV s<sup>-1</sup>.

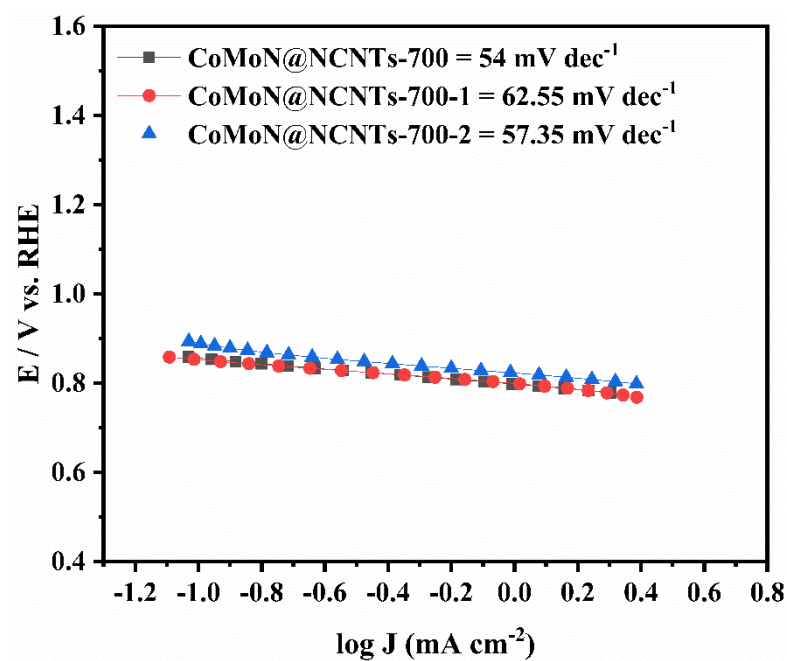

**Figure S6.** ORR Tafel of CoMoN@NCNTs-700, CoMoN@NCNTs-700-1 and CoMoN@NCNTs-700-2.

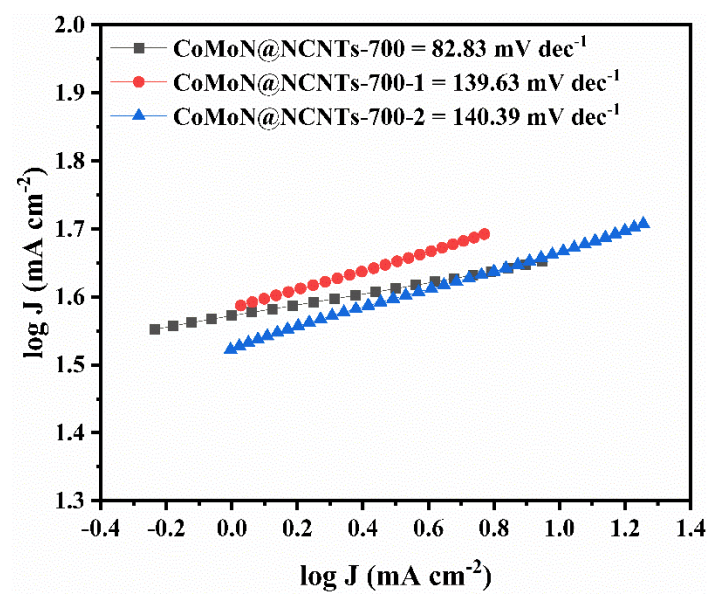

**Figure S7.** OER Tafel of CoMoN@NCNTs-700, CoMoN@NCNTs-700-1 and CoMoN@NCNTs-700-2.



**Table S1.** ORR, OER activities of previously reported bifunctional electrocatalysts at 1600 rpm.

| Electrocatalysts                                 | ORR                          |                               |                                        | OER                         |                                        | OER-ORR    |                                                               |
|--------------------------------------------------|------------------------------|-------------------------------|----------------------------------------|-----------------------------|----------------------------------------|------------|---------------------------------------------------------------|
|                                                  | $E_{\text{ORR}, 1/2}$<br>(V) | $J$<br>(mA cm <sup>-2</sup> ) | Tafel slope<br>(mV dec <sup>-1</sup> ) | $E_{\text{OER}, 10}$<br>(V) | Tafel slope<br>(mV dec <sup>-1</sup> ) | $\Delta E$ |                                                               |
| CoMoN@NCNTs-700<br>(this work)                   | 0.78                         | 5.3                           | 54                                     | 1.60                        | 82.8                                   | 0.82       |                                                               |
| CoMoN@NCNTs-600                                  | 0.75                         | 4.7                           | 63.2                                   | 1.78                        | 140.2                                  | 1.03       |                                                               |
| CoMoN@NCNTs-800                                  | 0.73                         | 3.9                           | 56.4                                   | 1.71                        | 102.6                                  | 0.98       |                                                               |
| TiO <sub>2</sub> C@CN <sub>x</sub>               | 0.75                         | 5.0                           | -                                      | 1.50                        | -                                      | 0.75       | Appl. Catal. B-Environ.<br>2019, 248, 366-379.                |
| NCN-1000-5                                       | 0.82                         | 6.4                           | 86                                     | 1.64                        | 142.0                                  | 0.82       | Energy Environ. Sci.<br>2019, 12 (1), 322-333.                |
| NB-CN                                            | 0.83                         | 4.9                           | 65                                     | 1.50                        | -                                      | 0.82       | Nano Energy 2017, 42,<br>334-340.                             |
| Co <sub>2</sub> B/Co/N-B-C/B <sub>4</sub> C      | 0.83                         | 4.9                           | 63                                     | 1.54                        | 111.0                                  | 0.71       | ACS Appl. Mater.<br>Interfaces 2018, 10<br>(43), 37067-37078. |
| PPy/FeTCPP/Co                                    | 0.86                         | 5.5                           | 65                                     | 1.61                        | 61.0                                   | 0.75       | Adv. Funct. Mater.<br>2017, 27 (17), 1606497.                 |
| Co/NGC                                           | 0.85                         | 3.9                           | 61                                     | 1.63                        | 92.0                                   | 0.78       | ACS Appl. Mater.<br>Interfaces 2020, 12 (5),<br>5717-5729.    |
| O-N-CN <sub>s</sub>                              | 0.86                         | 8.0                           | -                                      | 1.61                        | 442.0                                  | 0.75       | ACS Appl. Mater.<br>Interfaces 2018, 10<br>(14), 11678-11688. |
| CoP-PBSCF                                        | 0.75                         | 4.3                           | 85.7                                   | 1.57                        | 81.5                                   | 0.82       | J. Mater. Chem. A<br>2019, 7 (46), 26607-<br>26617.           |
| Co <sub>2</sub> Mn <sub>1</sub>                  | 0.78                         | -                             | -                                      | 1.57                        | -                                      | 0.79       | ACS Sustainable Chem.<br>Eng. 2018, 6 (11),<br>14641-14651.   |
| Co <sub>9</sub> S <sub>8</sub> @MoS <sub>2</sub> | -                            | -                             | -                                      | 1.57                        | 94.0                                   | -          | ACS Appl. Mater.<br>Interfaces 2018, 10 (2),<br>1678-1689.    |
| Rh <sub>6</sub> Cu <sub>1</sub> /C               | 0.85                         | -                             | 55                                     | 1.53                        | 70.0                                   | 0.71       | ACS Appl. Mater.<br>Interfaces 2020, 12 (9),<br>10299-10306.  |
| N-NiCo <sub>2</sub> O <sub>4</sub> @C            | 0.81                         | -                             | -                                      | 1.47                        | 85.0                                   | 0.66       | ACS Appl. Mater.<br>Interfaces 2019, 11<br>(49), 45546-45553. |

|                                                                                       |      |     |    |      |       |      |                                                         |
|---------------------------------------------------------------------------------------|------|-----|----|------|-------|------|---------------------------------------------------------|
| NCNT/CoFe-CoFe <sub>2</sub> O <sub>4</sub>                                            | 0.74 | -   | -  | 1.54 | 63.0  | 0.8  | ACS Appl. Mater. Interfaces 2018, 10 (46), 39828-39838. |
| Cu-14-Co <sub>3</sub> Se <sub>4</sub> /GC                                             | 0.78 | -   | 56 | 1.51 | 111.0 | 0.73 | ACS Catal. 2019, 9 (12), 10761-10772.                   |
| Co <sub>9</sub> S <sub>8</sub> -MoS <sub>2</sub> /N-NAs@CNFs                          | 0.82 | 5.3 | -  | 1.57 | 84.0  | 0.75 | ACS Appl. Mater. Interfaces 2020, 12 (9), 10280-10290.  |
| ZnCo-PVP-900                                                                          | 0.83 | 5.3 | 52 | 1.65 | -     | 0.82 | ACS Appl. Mater. Interfaces 2019, 11 (10), 9925-9933.   |
| Co <sub>9</sub> S <sub>8</sub> @Co <sub>9</sub> S <sub>8</sub> @MoS <sub>2</sub> -0.5 | 0.78 | 4.7 | -  | 1.57 | 82.7  | 0.79 | Inorg. Chem. Front. 2020, 7 (1), 191-197.               |
| CoP@SNC                                                                               | 0.79 | 4.9 | -  | 1.60 | 68.0  | 0.81 | Nanoscale 2018, 10 (30), 14613-14626.                   |
| NiCoFe-LDH                                                                            | 0.63 | -   | -  | 1.57 | -     | 0.94 | Adv. Energy Mater. 2015, 5 (13) 1500245.                |
| NiO/CoN Porous Nanowires                                                              | 0.68 | -   | -  | 1.53 | -     | 0.85 | ACS Nano 2017, 11 (2), 2275-2283.                       |
| CoDNi-N/C                                                                             | 0.81 | 5.5 | 53 | 1.59 | 72    | 0.78 | Appl. Catal. B-Environ. 2019, 240, 112-121.             |
| CoNi(OH) <sub>x</sub>                                                                 | -    | -   | -  | 1.51 | 77    | -    | Adv. Energy Mater. 2016, 6 (3) 1501661.                 |
